# Supplementary material for: Surgical techniques for degenerative cervical spine in Finland from 1999 to 2015
Source: Springer Nature journal article supplement (doi:10.1007/s00701-019-04026-9), 2019-08-10
Supplement: MOESM1 [file 17056236]

Supplementary material to “Surgical techniques for degenerative cervical spine in Finland from 1999 to 2015”.

**Supplementary Table S1. Adjusted annual incidence of posterior decompression and fusion operations in each diagnostic group (operations / 100 000 people age 18 or older).**

| <b>Year</b>    | <b>Disc protrusion</b> | <b>Foraminal stenosis</b> | <b>Spinal canal stenosis</b> | <b>Degenerative atlanto-axial subluxation</b> | <b>Degenerative indications combined</b> |
|----------------|------------------------|---------------------------|------------------------------|-----------------------------------------------|------------------------------------------|
| <b>1999</b>    | 0                      | 0                         | 0                            | 0.1                                           | 0.2                                      |
| <b>2000</b>    | 0                      | 0.1                       | 0                            | 0.1                                           | 0.2                                      |
| <b>2001</b>    | 0                      | 0.1                       | 0.1                          | 0.1                                           | 0.2                                      |
| <b>2002</b>    | 0                      | 0                         | 0.1                          | 0.1                                           | 0.2                                      |
| <b>2003</b>    | 0                      | 0.1                       | 0.1                          | 0.1                                           | 0.3                                      |
| <b>2004</b>    | 0                      | 0                         | 0.3                          | 0.1                                           | 0.4                                      |
| <b>2005</b>    | 0                      | 0                         | 0.2                          | 0                                             | 0.3                                      |
| <b>2006</b>    | 0                      | 0.1                       | 0.2                          | 0                                             | 0.3                                      |
| <b>2007</b>    | 0                      | 0.1                       | 0.4                          | 0                                             | 0.5                                      |
| <b>2008</b>    | 0                      | 0.1                       | 0.2                          | 0                                             | 0.3                                      |
| <b>2009</b>    | 0                      | 0.2                       | 0.3                          | 0                                             | 0.4                                      |
| <b>2010</b>    | 0                      | 0.3                       | 0.3                          | 0                                             | 0.6                                      |
| <b>2011</b>    | 0                      | 0.1                       | 0.5                          | 0                                             | 0.6                                      |
| <b>2012</b>    | 0                      | 0.1                       | 0.5                          | 0                                             | 0.6                                      |
| <b>2013</b>    | 0                      | 0.3                       | 0.3                          | 0                                             | 0.6                                      |
| <b>2014</b>    | 0                      | 0.2                       | 0.5                          | 0.1                                           | 0.7                                      |
| <b>2015</b>    | 0                      | 0.2                       | 0.4                          | 0                                             | 0.7                                      |
| <b>Overall</b> | 0                      | 0.1                       | 0.3                          | 0                                             | 0.4                                      |

**Supplementary Table S2. The distribution of operative techniques according to the NOMESCO<sup>a</sup> operative codes in each university hospital.**

| Operative techniques               |                         | The distribution of the operations in each hospital, % (N) |                |                |                |               |                 |
|------------------------------------|-------------------------|------------------------------------------------------------|----------------|----------------|----------------|---------------|-----------------|
|                                    |                         | Helsinki                                                   | Kuopio         | Oulu           | Tampere        | Turku         | Overall         |
| Anterior decompression             | ABC01<br>ABC10<br>ABC20 | 1.5<br>(95)                                                | 1.0<br>(50)    | 3.4<br>(73)    | 2.4<br>(112)   | 7.3<br>(132)  | 2.3<br>(461)    |
| Foraminotomy*                      | ABC30                   | 30.0<br>(1876)                                             | 3.2<br>(158)   | 17.4<br>(347)  | 10.8<br>(498)  | 6.8<br>(122)  | 15.2<br>(3001)  |
| Unspecified decompression          | ABC99                   | 5.9<br>(370)                                               | 0.9<br>(46)    | 0.7<br>(15)    | 2.2<br>(102)   | 1.1<br>(20)   | 2.8<br>(553)    |
| ACDF <sup>b</sup> without plating  | NAG40<br>ABC21          | 44.2<br>(2764)                                             | 82.1<br>(4041) | 61.6<br>(1303) | 60.0<br>(2772) | 8.3<br>(150)  | 56.0<br>(11030) |
| ACDF <sup>b</sup> with plating*    | NAG41                   | 3.4<br>(215)                                               | 3.7<br>(180)   | 4.2<br>(88)    | 12.8<br>(590)  | 52.1<br>(937) | 10.2<br>(2010)  |
| Disc prosthesis                    | NAB92                   | 0.4<br>(22)                                                | 0.0<br>(1)     | 0.9<br>(19)    | 0.1<br>(3)     | 0.7<br>(12)   | 0.3<br>(57)     |
| Corpectomy                         | NAG72                   | 0                                                          | 0              | 0.1<br>(2)     | 0.0<br>(1)     | 0.1<br>(1)    | 0.0<br>(4)      |
| Laminectomy / laminoplasty         | ABC50<br>ABC60          | 12.3<br>(771)                                              | 6.2<br>(306)   | 9.5<br>(202)   | 8.5<br>(391)   | 17.4<br>(313) | 10.1<br>(1984)  |
| Posterior decompression and fusion | NAG42                   | 2.1<br>(134)                                               | 2.8<br>(138)   | 3.2<br>(67)    | 3.3<br>(151)   | 6.2<br>(111)  | 3.1<br>(601)    |
| <b>Total</b>                       |                         | 6247                                                       | 4920           | 2116           | 4620           | 1798          | 19701           |

\* The foraminotomy code (ABC30) was used for ACDF as well as foraminotomy in Helsinki until 2005-2006; the ACDF code NAG41 was used in Turku for most ACDF operations, with or without plating

<sup>a</sup>NOMESCO Nordic Medico-Statistical Committee Classification of Surgical Procedures, <sup>b</sup>ACDF Anterior cervical decompression and fusion

**Supplementary Table S3. The distribution of the operative techniques within the diagnosis groups (% , N).**

|                                     | Anterior decompression | Foraminotomy*  | Unspecified decompression | ACDF <sup>b</sup> without plating | ACDF <sup>b</sup> with plating* | Disc prosthesis | Corpectomy | Laminectomy / laminoplasty | PDF <sup>c</sup> |
|-------------------------------------|------------------------|----------------|---------------------------|-----------------------------------|---------------------------------|-----------------|------------|----------------------------|------------------|
| <b>Disc protrusion</b>              | 6.7<br>(460)           | 14.9<br>(1029) | 0                         | 59.7<br>(4134)                    | 16.5<br>(1141)                  | 0.8<br>(57)     | 0          | 1.5<br>(103)               | 0                |
| <b>Foraminal stenosis</b>           | 0                      | 19.0<br>(1306) | 0.6<br>(40)               | 72.8<br>(5001)                    | 5.6<br>(383)                    | 0               | 0          | 0.8<br>(56)                | 1.3<br>(88)      |
| <b>Spinal canal stenosis</b>        | 0                      | 11.9<br>(666)  | 9.2<br>(513)              | 34.0<br>(1895)                    | 8.7<br>(486)                    | 0               | 0.1<br>(4) | 13.8<br>(773)              | 3.4<br>(192)     |
| <b>Rheumatoid AAS<sup>a</sup></b>   | 0                      | 0              | 0                         | 0                                 | 0                               | 0               | 0          | 0                          | 100.0<br>(30)    |
| <b>Degenerative AAS<sup>a</sup></b> | 0                      | 0              | 0                         | 0                                 | 0                               | 0               | 0          | 0                          | 100.0<br>(291)   |

\* The foraminotomy code (ABC30) was used for ACDF as well as foraminotomy in Helsinki until 2005-2006; the ACDF code NAG41 was used in Turku for most ACDF operations, with or without plating

<sup>a</sup>AAS Atlanto-axial subluxation, <sup>b</sup>ACDF Anterior Cervical Decompression and Fusion, <sup>c</sup>PDF posterior decompression and fusion

**Supplementary Figure S4. The proportional use of anterior (a) and posterior (b) techniques in the treatment of degenerative cervical spine disease between 1999 and 2015.**

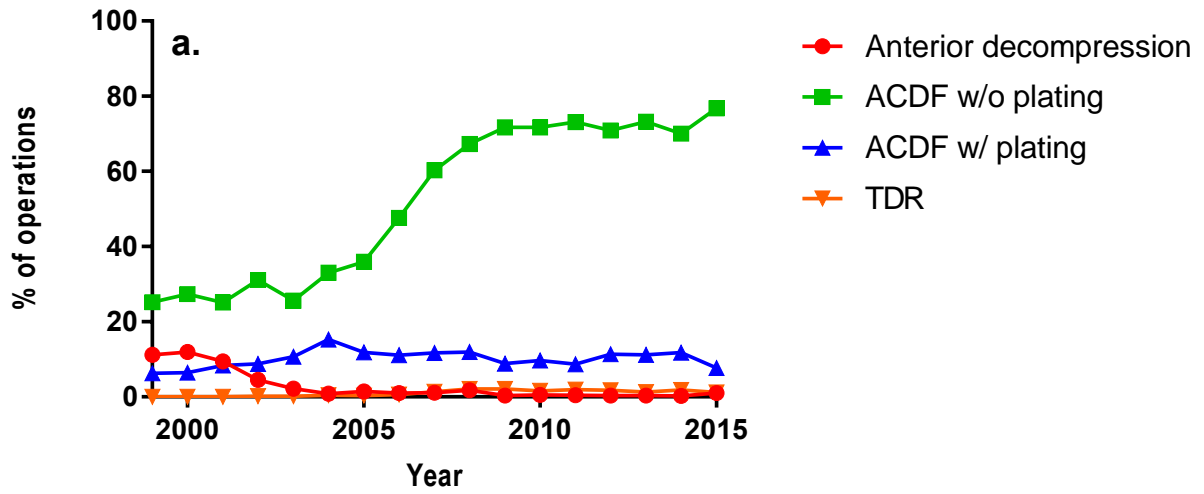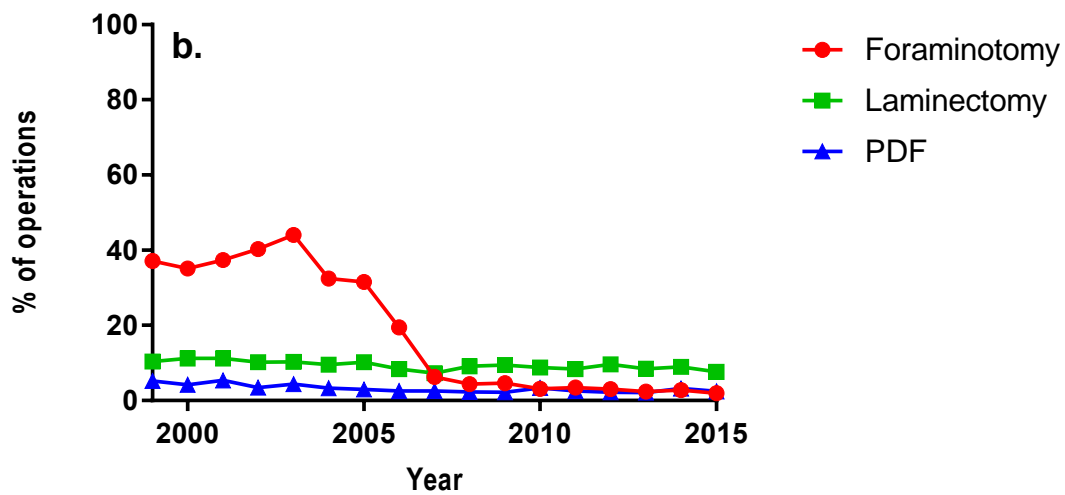

ACDF Anterior cervical decompression and fusion, w/ with, w/o without, TDR total disc replacement, PDF posterior decompression and fusion.
